# Supplementary material
Source: PubMed Central journal article supplement (PMC3462625)
Supplement: supp_tpc.111.093815_tpc093815SupplementalData.pdf [file supp_tpc.111.093815_tpc093815SupplementalData.pdf]

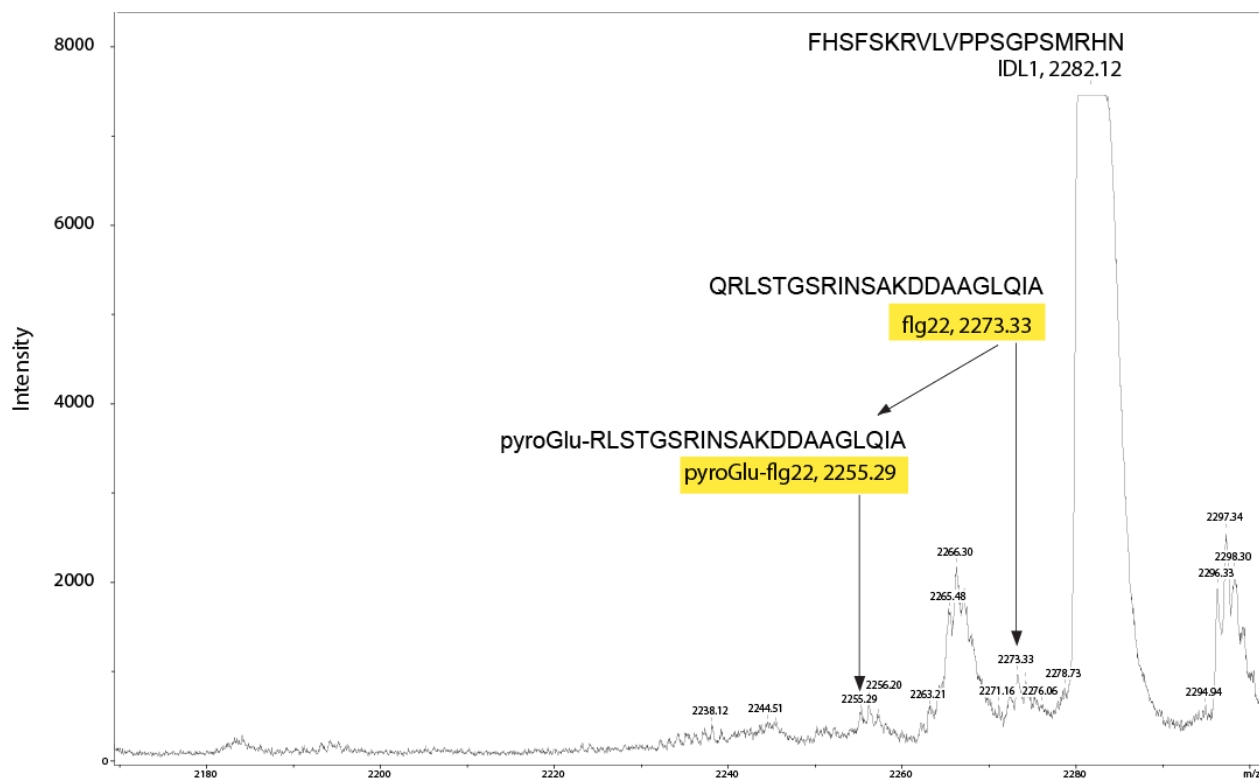

Supplemental Figure 1. MALDI-TOF analysis of IDL1 (preparation I) after re-purification on C18 reversed-phase column. The main peak eluting from this column still shows flg22-type of activity and contains IDL1 (m/z 2282.12) but also signatures of masses indicative for flg22.

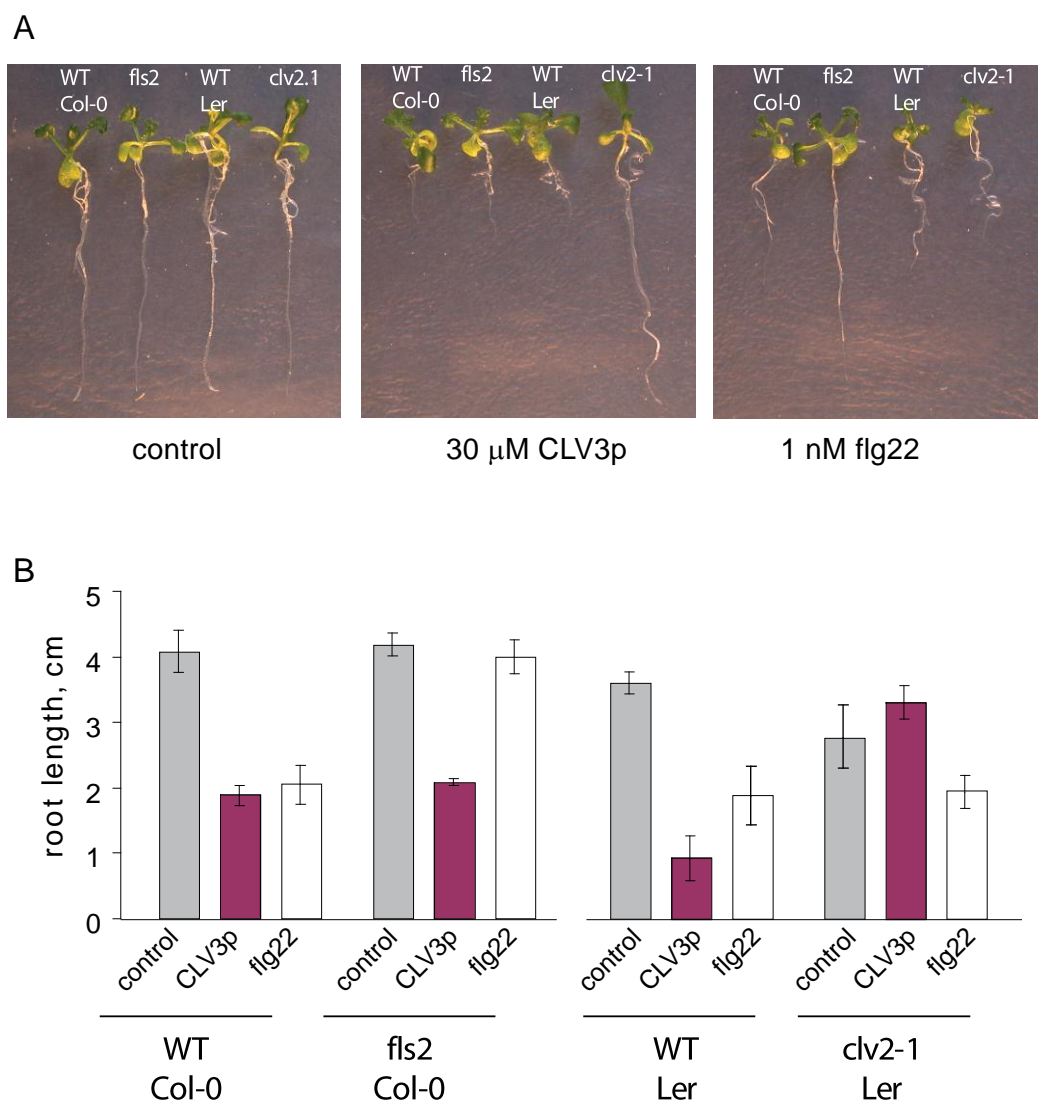

Supplemental Figure 2. Effect of CLV3p and flg22 on the growth of Arabidopsis seedlings. Five day old seedlings (Col-0, *fls2* in Col-0 background, Ler and *clv2-1* in Ler background) were grown for 8 days on medium supplemented with 30  $\mu$ M CLV3p or 1 nM flg22, as indicated. A) Picture of a representative seedling for each treatment. B) Root length of the seedlings. Bars and error bars indicate means and standard deviation of  $n=4$  seedlings.
